# Supplementary material
Source: MDPI journal article supplement (https://www.mdpi.com/2073-445X/10/1/40)
Supplement: s1 [file s1]

## Search strings for Scopus and Web of Science databases

Search string for Scopus database = 200 hits

```
( TITLE-ABS-KEY ( ( "Southeast Asia" OR "South East Asia" OR "Indonesia" OR "Vietnam" OR "Thailand" OR "Malaysia" OR "Singapore" OR "Philippines" OR "Cambodia" OR "Laos" OR "Myanmar" OR "Brunei" OR "Timor-Leste" ) ) ) AND ( TITLE-ABS-KEY ( ( "ecosystem service*" OR "natural capital" OR ( "human" AND "environment" AND "benefit*" ) ) ) ) AND ( TITLE-ABS-KEY ( "urban" OR "city" OR "cities" ) ) AND ( EXCLUDE ( PUBYEAR , 1994 ) OR EXCLUDE ( PUBYEAR , 1991 ) OR EXCLUDE ( PUBYEAR , 1990 ) OR EXCLUDE ( PUBYEAR , 1983 ) OR EXCLUDE ( PUBYEAR , 1975 ) OR EXCLUDE ( PUBYEAR , 1971 ) ) AND ( EXCLUDE ( DOCTYPE , "review" ) OR EXCLUDE ( DOCTYPE , "bk" ) OR EXCLUDE ( DOCTYPE , "cr" ) OR EXCLUDE ( DOCTYPE , "er" ) ) AND ( EXCLUDE ( LANGUAGE , "Chinese" ) OR EXCLUDE ( LANGUAGE , "French" ) ) )
```

Search string for Web of Science database = 143 hits

```
TS=( ( "Southeast Asia" OR "South East Asia" OR "Indonesia" OR "Vietnam" OR "Thailand" OR "Malaysia" OR "Singapore" OR "Philippines" OR "Cambodia" OR "Laos" OR "Myanmar" OR "Brunei" OR "Timor-Leste" ) AND ( "ecosystem service*" OR "natural capital" OR ( "human" AND "environment" AND "benefit*" ) ) ) AND ( "urban" OR "city" OR "cities" ) )  
Refined by: [excluding] DOCUMENT TYPES: ( REVIEW OR CORRECTION ) AND LANGUAGES: ( ENGLISH )
```

Search conducted on 2.8.2020 on both databases.
