# Supplementary material
Source: MDPI journal article supplement (https://www.mdpi.com/2073-445X/10/1/40)
Supplement: s1 [file s1]

Table S1: Bibliography of the 149 studies analysed in this review.

| Author(s)                                                                            | Year | Title                                                                                                                                                         | Source                                                                                                                                                                              |
|--------------------------------------------------------------------------------------|------|---------------------------------------------------------------------------------------------------------------------------------------------------------------|-------------------------------------------------------------------------------------------------------------------------------------------------------------------------------------|
| Abdullah, R., Kanniah, K. D., & Ho, C. S.                                            | 2018 | Identification of suitable trees for urban parks and roadsides in Iskandar Malaysia.                                                                          | <i>Chemical Engineering Transactions</i> , 63, 385–390.<br><a href="https://doi.org/10.3303/CET1863065">https://doi.org/10.3303/CET1863065</a>                                      |
| Abino, A. C., Castillo, J. A. A., & Lee, Y. J.                                       | 2014 | Assessment of species diversity, biomass and carbon sequestration potential of a natural mangrove stand in Samar, the Philippines.                            | <i>Forest Science and Technology</i> , 10(1), 2–8.<br><a href="https://doi.org/10.1080/21580103.2013.814593">https://doi.org/10.1080/21580103.2013.814593</a>                       |
| Achmad, A., Ramli, I., & Irwansyah, M.                                               | 2020 | The impacts of land use and cover changes on ecosystem services value in urban highland areas.                                                                | <i>IOP Conference Series: Earth and Environmental Science</i> , 447(1). <a href="https://doi.org/10.1088/1755-1315/447/1/012047">https://doi.org/10.1088/1755-1315/447/1/012047</a> |
| Achmad, Ashfa, Irwansyah, M., Nizamuddin, N., & Ramli, I.                            | 2019 | Land Use and Cover Changes and Their Implications on Local Climate in Sabang City, Weh Island, Indonesia.                                                     | <i>Journal of Urban Planning and Development</i> , 145(4), 1–7. <a href="https://doi.org/10.1061/(ASCE)UP.1943-5444.0000536">https://doi.org/10.1061/(ASCE)UP.1943-5444.0000536</a> |
| Adnan, N.                                                                            | 2018 | Mapping recreation of FRIM via social media                                                                                                                   | <i>ASM Science Journal</i> , 11(Special Issue 3), 168–171.                                                                                                                          |
| Afriyanie, D., Julian, M. M., Riqqi, A., Akbar, R., Suroso, D. S. A., & Kustiwan, I. | 2020 | Re-framing urban green spaces planning for flood protection through socio-ecological resilience in Bandung City, Indonesia.                                   | <i>Cities</i> , 101(10), 102710.<br><a href="https://doi.org/10.1016/j.cities.2020.102710">https://doi.org/10.1016/j.cities.2020.102710</a>                                         |
| Ahmad, C. B., Abdullah, J., Jaafar, J., & Anuar, A. N. A.                            | 2017 | Spatial Adaptation of Protected Area Buffer Zones in Urban Setting: Impact on human and conservation agenda.                                                  | <i>Environment-Behaviour Proceedings Journal</i> , 2(5), 65.<br><a href="https://doi.org/10.21834/e-bpj.v2i5.683">https://doi.org/10.21834/e-bpj.v2i5.683</a>                       |
| Ajrina, H., & Kustiwan, I. (2019).                                                   | 2019 | From green open space to green infrastructure: The potential of green open space optimization towards sustainable cities in Bekasi City & Regency, Indonesia. | <i>IOP Conference Series: Earth and Environmental Science</i> , 399(1). <a href="https://doi.org/10.1088/1755-1315/399/1/012130">https://doi.org/10.1088/1755-1315/399/1/012130</a> |
| Alves, A., Gómez, J. P., Vojinovic, Z., Sánchez, A., & Weesakul, S.                  | 2018 | Combining co-benefits and stakeholders perceptions into green infrastructure selection for flood risk reduction.                                              | <i>Environments - MDPI</i> , 5(2), 1–23.<br><a href="https://doi.org/10.3390/environments5020029">https://doi.org/10.3390/environments5020029</a>                                   |

|                                                                                             |      |                                                                                                                                        |                                                                                                                                                                  |
|---------------------------------------------------------------------------------------------|------|----------------------------------------------------------------------------------------------------------------------------------------|------------------------------------------------------------------------------------------------------------------------------------------------------------------|
| Ancog, R., & Ruzol, C.                                                                      | 2015 | Urbanization adjacent to a wetland of international importance: The case of Olango Island Wildlife Sanctuary, Metro Cebu, Philippines. | <i>Habitat International</i> , 49, 325–332.<br><a href="https://doi.org/10.1016/j.habitatint.2015.06.007">https://doi.org/10.1016/j.habitatint.2015.06.007</a>   |
| Arifin, H. S., & Nakagoshi, N.                                                              | 2011 | Landscape ecology and urban biodiversity in tropical Indonesian cities                                                                 | <i>Landscape and Ecological Engineering</i> , 7(1), 33–43.<br><a href="https://doi.org/10.1007/s11355-010-0145-9">https://doi.org/10.1007/s11355-010-0145-9</a>  |
| Baharuddin, Z. M., Rusli, N., Ramli, L., Othman, R., & Yaman, M.                            | 2017 | The diversity of birds and frogs species at perdana botanical lake Garden, Kuala Lumpur, Malaysia.                                     | <i>Advanced Science Letters</i> , 23(7), 6256–6260.<br><a href="https://doi.org/10.1166/asl.2017.9247">https://doi.org/10.1166/asl.2017.9247</a>                 |
| Balmford, A., Chen, H., Phalan, B., Wang, M., O’Connell, C., Tayleur, C., & Xu, J.          | 2016 | Getting Road Expansion on the Right Track: A Framework for Smart Infrastructure Planning in the Mekong.                                | <i>PLoS Biology</i> , 14(12).<br><a href="https://doi.org/10.1371/journal.pbio.2000266">https://doi.org/10.1371/journal.pbio.2000266</a>                         |
| Barau, A. S.                                                                                | 2015 | Perceptions and contributions of households towards sustainable urban green infrastructure in Malaysia.                                | <i>Habitat International</i> , 47, 285–297.<br><a href="https://doi.org/10.1016/j.habitatint.2015.02.003">https://doi.org/10.1016/j.habitatint.2015.02.003</a>   |
| Belcher, R.N., & Chisholm, R. A.                                                            | 2018 | Tropical Vegetation and Residential Property Value: A Hedonic Pricing Analysis in Singapore.                                           | <i>Ecological Economics</i> , 149, 149–159.<br><a href="https://doi.org/10.1016/j.ecolecon.2018.03.012">https://doi.org/10.1016/j.ecolecon.2018.03.012</a>       |
| Belcher, Richard N., Sadanandan, K. R., Goh, E. R., Chan, J. Y., Menz, S., & Schroepfer, T. | 2019 | Vegetation on and around large-scale buildings positively influences native tropical bird abundance and bird species richness.         | <i>Urban Ecosystems</i> , 22(2), 213–225.<br><a href="https://doi.org/10.1007/s11252-018-0808-0">https://doi.org/10.1007/s11252-018-0808-0</a>                   |
| Benzeev, R., Hutchinson, N., & Friess, D. A.                                                | 2017 | Quantifying fisheries ecosystem services of mangroves and tropical artificial urban shorelines.                                        | <i>Hydrobiologia</i> , 803(1), 225–237.<br><a href="https://doi.org/10.1007/s10750-017-3299-8">https://doi.org/10.1007/s10750-017-3299-8</a>                     |
| Bitonon, J. B.                                                                              | 2020 | Climate risk vulnerability assessment: Basis for decision making support for the agriculture sector in the province of Iloilo          | <i>International Journal of Innovation, Creativity and Change</i> , 13(3), 186–202.                                                                              |
| Bouma, G. A., & Kobryn, H. T.                                                               | 2004 | Change in vegetation cover in East Timor, 1989-1999.                                                                                   | <i>Natural Resources Forum</i> , 28(1), 1–12.<br><a href="https://doi.org/10.1111/j.0165-0203.2004.00067.x">https://doi.org/10.1111/j.0165-0203.2004.00067.x</a> |
| Brown, A., Dayal, A., & Rumbaitis Del Rio, C.                                               | 2012 | From practice to theory: emerging lessons from Asia for building urban climate change resilience.                                      | <i>Environment and Urbanization</i> , 24(2), 531–556.<br><a href="https://doi.org/10.1177/0956247812456490">https://doi.org/10.1177/0956247812456490</a>         |

|                                                                                                                                                   |      |                                                                                                                                                                                |                                                                                                                                                                                                  |
|---------------------------------------------------------------------------------------------------------------------------------------------------|------|--------------------------------------------------------------------------------------------------------------------------------------------------------------------------------|--------------------------------------------------------------------------------------------------------------------------------------------------------------------------------------------------|
| Brown, G., & Hausner, V. H.                                                                                                                       | 2017 | An empirical analysis of cultural ecosystem values in coastal landscapes.                                                                                                      | <i>Ocean and Coastal Management</i> , 142, 49–60.<br><a href="https://doi.org/10.1016/j.ocecoaman.2017.03.019">https://doi.org/10.1016/j.ocecoaman.2017.03.019</a>                               |
| Bueno, E. A., Ancog, R., Obalan, E., Cero, A. D., Simon, A. N., Malvecino-Macalintal, M. R., Bactong Jr, M., Lunar, J., Buena, G.R. and Sugui, L. | 2016 | Measuring Households' Willingness to Pay for Water Quality Restoration of a Natural Urban Lake in the Philippines.                                                             | <i>Environmental Processes</i> , 3(4), 875–894.<br><a href="https://doi.org/10.1007/s40710-016-0169-8">https://doi.org/10.1007/s40710-016-0169-8</a>                                             |
| Chakraborty, T., & Lee, X.                                                                                                                        | 2019 | A simplified urban-extent algorithm to characterize surface urban heat islands on a global scale and examine vegetation control on their spatiotemporal variability.           | <i>International Journal of Applied Earth Observation and Geoinformation</i> , 74, 269–280.<br><a href="https://doi.org/10.1016/j.jag.2018.09.015">https://doi.org/10.1016/j.jag.2018.09.015</a> |
| Chan, A. A. Q., Aziz, S. A., Clare, E. L., & Coleman, J. L.                                                                                       | 2020 | Diet, ecological role and potential ecosystem services of the fruit bat, <i>Cynopterus brachyotis</i> , in a tropical city.                                                    | <i>Urban Ecosystems</i> , (Corlett 1992).<br><a href="https://doi.org/10.1007/s11252-020-01034-x">https://doi.org/10.1007/s11252-020-01034-x</a>                                                 |
| Danielaini, T. T., Maheshwari, B., & Hagare, D.                                                                                                   | 2018 | Defining rural–urban interfaces for understanding ecohydrological processes in West Java, Indonesia: Part II. Its application to quantify rural–urban interface ecohydrology.  | <i>Ecohydrology and Hydrobiology</i> , 18(1), 37–51.<br><a href="https://doi.org/10.1016/j.ecohyd.2017.11.007">https://doi.org/10.1016/j.ecohyd.2017.11.007</a>                                  |
| Danielaini, T., Maheshwari, B., & Hagare, D.                                                                                                      | 2019 | Qualitative and quantitative analysis of perceived liveability in the context of socio-ecohydrology: evidence from the urban and peri-urban Cirebon-Indonesia.                 | <i>Journal of Environmental Planning and Management</i> , 62(12), 2026–2054.<br><a href="https://doi.org/10.1080/09640568.2018.1524576">https://doi.org/10.1080/09640568.2018.1524576</a>        |
| De Leon, R. C., & Kim, S. M.                                                                                                                      | 2017 | Stakeholder perceptions and governance challenges in urban protected area management: The case of the Las Piñas – Parañaque Critical Habitat and Ecotourism Area, Philippines. | <i>Land Use Policy</i> , 63, 470–480.<br><a href="https://doi.org/10.1016/J.LANDUSEPOL.2017.02.011">https://doi.org/10.1016/J.LANDUSEPOL.2017.02.011</a>                                         |

|                                                                                                 |      |                                                                                                                                                                             |                                                                                                                                                                           |
|-------------------------------------------------------------------------------------------------|------|-----------------------------------------------------------------------------------------------------------------------------------------------------------------------------|---------------------------------------------------------------------------------------------------------------------------------------------------------------------------|
| Drillet, Z., Fung, T. K., Leong, R. A. T., Sachidhanandam, U., Edwards, P., & Richards, D.      | 2020 | Urban vegetation types are not perceived equally in providing ecosystem services and disservices.                                                                           | <i>Sustainability (Switzerland)</i> , 12(5).<br><a href="https://doi.org/10.3390/su12052076">https://doi.org/10.3390/su12052076</a>                                       |
| Edwards, P.                                                                                     | 2019 | The role of ecosystem services in making cities sustainable.                                                                                                                | In <i>SpringerBriefs in Architectural Design and Technology</i> . <a href="https://doi.org/10.1007/978-981-13-0713-3_16">https://doi.org/10.1007/978-981-13-0713-3_16</a> |
| el-Baghdadi, O., & Desha, C.                                                                    | 2017 | Conceptualising a biophilic services model for urban areas.                                                                                                                 | <i>Urban Forestry and Urban Greening</i> , 27, 399–408.<br><a href="https://doi.org/10.1016/j.ufug.2016.10.016">https://doi.org/10.1016/j.ufug.2016.10.016</a>            |
| Elliott, S., Chairuangsi, S., Shannon, D., Nippanon, P., & Amphon, R.                           | 2018 | Developing forest restoration approaches for northern Thailand                                                                                                              | <i>Natural History Bulletin of the Siam Society</i> , 63(1), 11–26.                                                                                                       |
| Estoque, R.C., & Murayama, Y.                                                                   | 2016 | Quantifying landscape pattern and ecosystem service value changes in four rapidly urbanizing hill stations of Southeast Asia.                                               | <i>Landscape Ecology</i> , 31(7), 1481–1507.<br><a href="https://doi.org/10.1007/s10980-016-0341-6">https://doi.org/10.1007/s10980-016-0341-6</a>                         |
| Estoque, R.C., & Murayama, Y.                                                                   | 2012 | Examining the potential impact of land use/cover changes on the ecosystem services of Baguio city, the Philippines: A scenario-based analysis.                              | <i>Applied Geography</i> , 35(1–2), 316–326.<br><a href="https://doi.org/10.1016/j.apgeog.2012.08.006">https://doi.org/10.1016/j.apgeog.2012.08.006</a>                   |
| Estoque, R.C., & Murayama, Y.                                                                   | 2013 | Landscape pattern and ecosystem service value changes: Implications for environmental sustainability planning for the rapidly urbanizing summer capital of the Philippines. | <i>Landscape and Urban Planning</i> , 116, 60–72.<br><a href="https://doi.org/10.1016/j.landurbplan.2013.04.008">https://doi.org/10.1016/j.landurbplan.2013.04.008</a>    |
| Estoque, R. C., Murayama, Y., & Myint, S. W.                                                    | 2017 | Effects of landscape composition and pattern on land surface temperature: An urban heat island study in the megacities of Southeast Asia.                                   | <i>Science of the Total Environment</i> , 577, 349–359.<br><a href="https://doi.org/10.1016/j.scitotenv.2016.10.195">https://doi.org/10.1016/j.scitotenv.2016.10.195</a>  |
| Estoque, R. C., Ooba, M., Seposo, X. T., Togawa, T., Hijioka, Y., Takahashi, K., & Nakamura, S. | 2020 | Heat health risk assessment in Philippine cities using remotely sensed data and social-ecological indicators.                                                               | <i>Nature Communications</i> , 11(1), 1–12.<br><a href="https://doi.org/10.1038/s41467-020-15218-8">https://doi.org/10.1038/s41467-020-15218-8</a>                        |

|                                                                       |      |                                                                                                               |                                                                                                                                                                                     |
|-----------------------------------------------------------------------|------|---------------------------------------------------------------------------------------------------------------|-------------------------------------------------------------------------------------------------------------------------------------------------------------------------------------|
| Fauzi, M. A.<br>Abd Ghafar, A.                                        | 2020 | Cultural Practices Generated by Structural Biodiversity of Two Urban Forests in Johor Bahru, Malaysia         | <i>International Journal of Built Environment and Sustainability</i> , 7(2), 15-23, <a href="https://doi.org/10.11113/ijbes.v7.n2.402">https://doi.org/10.11113/ijbes.v7.n2.402</a> |
| Fitri, M., Triyadi, S., & Harun, I. B.                                | 2017 | A topology of residents' based on preferences for sustainable riparian settlement in Palembang, Indonesia     | <i>MATEC Web of Conferences</i> , 101, <a href="https://doi.org/10.1051/mateconf/201710105025">https://doi.org/10.1051/mateconf/201710105025</a>                                    |
| Friess, D. A.                                                         | 2017 | Singapore as a long-term case study for tropical urban ecosystem services.                                    | <i>Urban Ecosystems</i> , 20(2), 277–291. <a href="https://doi.org/10.1007/s11252-016-0592-7">https://doi.org/10.1007/s11252-016-0592-7</a>                                         |
| Friess, D. A., Richards, D. R., & Phang, V. X. H.                     | 2016 | Mangrove forests store high densities of carbon across the tropical urban landscape of Singapore.             | <i>Urban Ecosystems</i> , 19(2), 795–810. <a href="https://doi.org/10.1007/s11252-015-0511-3">https://doi.org/10.1007/s11252-015-0511-3</a>                                         |
| Ghosh, S., Scharenbroch, B. C., & Ow, L. F.                           | 2016 | Soil organic carbon distribution in roadside soils of Singapore.                                              | <i>Chemosphere</i> , 165, 163–172. <a href="https://doi.org/10.1016/j.chemosphere.2016.09.028">https://doi.org/10.1016/j.chemosphere.2016.09.028</a>                                |
| Ghosh, S., Deb, S., Ow, L. F., Deb, D., & Yusof, M. L.                | 2019 | Soil characteristics in an exhumed cemetery land in Central Singapore.                                        | <i>Environmental Monitoring and Assessment</i> , 191(3). <a href="https://doi.org/10.1007/s10661-019-7291-9">https://doi.org/10.1007/s10661-019-7291-9</a>                          |
| Gret-Regamey, A., Galleguillos-Torres, M., Dissegna, A., & Weibel, B. | 2020 | How urban densification influences ecosystem services - A comparison between a temperate and a tropical city. | <i>Environmental Research Letters</i> , 15(7). <a href="https://doi.org/10.1088/1748-9326/ab7acf">https://doi.org/10.1088/1748-9326/ab7acf</a>                                      |
| Gunawan, H., Sugiarti, Rianti, A., & Sihombing, V. S.                 | 2016 | Diversity of faunal communities in the Biodiversity Park of Ciherang, Bogor, West Java, Indonesia.            | <i>Biodiversitas</i> , 17(2), 479–486. <a href="https://doi.org/10.13057/biodiv/d170212">https://doi.org/10.13057/biodiv/d170212</a>                                                |
| Gunnell, K., Mulligan, M., Francis, R. A., & Hole, D. G.              | 2019 | Evaluating natural infrastructure for flood management within the watersheds of selected global cities.       | <i>Science of the Total Environment</i> , 670, 411–424. <a href="https://doi.org/10.1016/j.scitotenv.2019.03.212">https://doi.org/10.1016/j.scitotenv.2019.03.212</a>               |
| Hails, C. J., & Kavanagh, M.                                          | 2013 | Bring back the birds! Planning for trees and other plants to support southeast Asian wildlife in urban areas. | <i>Raffles Bulletin of Zoology</i> , (SUPPL. 29), 243–258.                                                                                                                          |
| Hamid, A. R. & Tan. P. Y.                                             | 2017 | Urban Ecological Networks for Biodiversity Conservation in Cities                                             | Greening Cities: Forms and Functions, <i>Advances in 21st Century Human Settlements</i> , doi 10.1007/978-981-10-4113-6_12 251                                                      |

|                                                                         |      |                                                                                                                                                                       |                                                                                                                                                                          |
|-------------------------------------------------------------------------|------|-----------------------------------------------------------------------------------------------------------------------------------------------------------------------|--------------------------------------------------------------------------------------------------------------------------------------------------------------------------|
| Hara, Y., Yamaji, K., Yokota, S., Thaitakoo, D., & Sampei, Y.           | 2018 | Dynamic wetland mosaic environments and Asian openbill habitat creation in peri-urban Bangkok.                                                                        | <i>Urban Ecosystems</i> , 21(2), 305–322.<br><a href="https://doi.org/10.1007/s11252-017-0718-6">https://doi.org/10.1007/s11252-017-0718-6</a>                           |
| Hassan, S., Olsen, S. B., & Thorsen, B. J.                              | 2019 | Urban-rural divides in preferences for wetland conservation in Malaysia                                                                                               | <i>Land Use Policy</i> , 84(August 2018), 226–237.<br><a href="https://doi.org/10.1016/j.landusepol.2019.03.015">https://doi.org/10.1016/j.landusepol.2019.03.015</a>    |
| Hedberg, N., Stenson, I., Kautsky, N., Hellström, M., & Tedengren, M.   | 2017 | Causes and consequences of spatial links between sea cage aquaculture and coral reefs in Vietnam.                                                                     | <i>Aquaculture</i> , 481(July), 245–254.<br><a href="https://doi.org/10.1016/j.aquaculture.2017.09.009">https://doi.org/10.1016/j.aquaculture.2017.09.009</a>            |
| Heery, E. C., Lian, K. Y., Loke, L. H. L., Tan, H. T. W., & Todd, P. A. | 2020 | Evaluating seaweed farming as an eco-engineering strategy for ‘blue’ shoreline infrastructure.                                                                        | <i>Ecological Engineering</i> , 152(November 2019), 105857.<br><a href="https://doi.org/10.1016/j.ecoleng.2020.105857">https://doi.org/10.1016/j.ecoleng.2020.105857</a> |
| Helen, & Gasparatos, A.                                                 | 2020 | Ecosystem services provision from urban farms in a secondary city of Myanmar, pyin oo lwin.                                                                           | <i>Agriculture (Switzerland)</i> , 10(5), 1–17.<br><a href="https://doi.org/10.3390/agriculture10050140">https://doi.org/10.3390/agriculture10050140</a>                 |
| Helen, Jarzebski, M. P., & Gasparatos, A.                               | 2019 | Land use change, carbon stocks and tree species diversity in green spaces of a secondary city in Myanmar, Pyin Oo Lwin.                                               | <i>PLoS ONE</i> , 14(11), 1–23.<br><a href="https://doi.org/10.1371/journal.pone.0225331">https://doi.org/10.1371/journal.pone.0225331</a>                               |
| Heng, S. L., & Chow, W. T. L.                                           | 2019 | How ‘hot’ is too hot? Evaluating acceptable outdoor thermal comfort ranges in an equatorial urban park.                                                               | <i>International Journal of Biometeorology</i> , 801–816.<br><a href="https://doi.org/10.1007/s00484-019-01694-1">https://doi.org/10.1007/s00484-019-01694-1</a>         |
| Hwang, Y. H., & Roscoe, C. J.                                           | 2017 | Preference for site conservation in relation to on-site biodiversity and perceived site attributes: An on-site survey of unmanaged urban greenery in a tropical city. | <i>Urban Forestry and Urban Greening</i> , 28, 12–20.<br><a href="https://doi.org/10.1016/j.ufug.2017.09.011">https://doi.org/10.1016/j.ufug.2017.09.011</a>             |
| Ibrahim, R., Clayden, A., & Cameron, R.                                 | 2020 | Tropical urban parks in Kuala Lumpur, Malaysia: Challenging the attitudes of park management teams towards a more environmentally sustainable approach.               | <i>Urban Forestry and Urban Greening</i> , 49(January), 126605. <a href="https://doi.org/10.1016/j.ufug.2020.126605">https://doi.org/10.1016/j.ufug.2020.126605</a>      |
| Irvine, K., Sovann, C., Suthipong, S., Kok, S., & Chea, E.              | 2015 | Application of PCSWMM to Assess Wastewater Treatment and Urban Flooding Scenarios in Phnom                                                                            | <i>Journal of Water Management Modeling</i> , (September).<br><a href="https://doi.org/10.14796/jwmm.c389">https://doi.org/10.14796/jwmm.c389</a>                        |

|                                                        |      |                                                                                                                                                 |                                                                                                                                                                                     |
|--------------------------------------------------------|------|-------------------------------------------------------------------------------------------------------------------------------------------------|-------------------------------------------------------------------------------------------------------------------------------------------------------------------------------------|
|                                                        |      | Penh, Cambodia: A Tool to Support Eco-City Planning.                                                                                            |                                                                                                                                                                                     |
| Jaung, W., & Carrasco, L. R.                           | 2020 | Travel cost analysis of an urban protected area and parks in Singapore: a mobile phone data application.                                        | <i>Journal of Environmental Management</i> , 261(June 2019), 110238.<br><a href="https://doi.org/10.1016/j.jenvman.2020.110238">https://doi.org/10.1016/j.jenvman.2020.110238</a>   |
| Kanniah, K. D., & Siong, H. C.                         | 2018 | Tree canopy cover and its potential to reduce CO2 in South of Peninsular Malaysia.                                                              | <i>Chemical Engineering Transactions</i> , 63, 13–18.<br><a href="https://doi.org/10.3303/CET1863003">https://doi.org/10.3303/CET1863003</a>                                        |
| Kim, J.-E.                                             | 2012 | Green network analysis in coastal cities using least-cost path analysis: a study of Jakarta, Indonesia.                                         | <i>Journal of Ecology and Environment</i> , 35(2), 141–147.<br><a href="https://doi.org/10.5141/jefb.2012.019">https://doi.org/10.5141/jefb.2012.019</a>                            |
| Koh, H. L., Tan, W. K., Teh, S. Y., & Tay, C. J.       | 2019 | Water quality simulation for rehabilitation of a eutrophic lake in Selangor, Malaysia.                                                          | <i>IOP Conference Series: Earth and Environmental Science</i> , 380(1). <a href="https://doi.org/10.1088/1755-1315/380/1/012006">https://doi.org/10.1088/1755-1315/380/1/012006</a> |
| Lagbas, A. J.                                          | 2019 | Social valuation of regulating and cultural ecosystem services of Arroceros Forest Park: A man-made forest in the city of Manila, Philippines.  | <i>Journal of Urban Management</i> , 8(1), 159–177.<br><a href="https://doi.org/10.1016/j.jum.2018.09.002">https://doi.org/10.1016/j.jum.2018.09.002</a>                            |
| Lawal, D. U., Matori, A. N., & Balogun, A. L.          | 2011 | A Geographic information system and multi-criteria decision analysis in proposing new recreational park sites in Universiti Teknologi Malaysia. | <i>Modern Applied Science</i> , 5(3), 39–55.<br><a href="https://doi.org/10.5539/mas.v5n3p39">https://doi.org/10.5539/mas.v5n3p39</a>                                               |
| Lee, W. K., Tay, S. H. X., Ooi, S. K., & Friess, D. A. | 2020 | Potential short wave attenuation function of disturbed mangroves.                                                                               | <i>Estuarine, Coastal and Shelf Science</i> , (March), 106747.<br><a href="https://doi.org/10.1016/j.ecss.2020.106747">https://doi.org/10.1016/j.ecss.2020.106747</a>               |
| Leksono, A. S., Poewoningsih, D., & Ika, N. W. P. M.   | 2018 | Green open space demand and community place attachment in Batu, East Java.                                                                      | <i>Landscape Ecology for Sustainable Society</i> , 285–294.<br><a href="https://doi.org/10.1007/978-3-319-74328-8_17">https://doi.org/10.1007/978-3-319-74328-8_17</a>              |
| Liao, K-H., Deng, S., & Tan, P. Y.                     | 2017 | Blue-Green Infrastructure: New Frontier for Sustainable Urban Stormwater Management                                                             | Greening Cities: Forms and Functions, Advances in 21st Century Human Settlements, doi:10.1007/978-981-10-4113-6_10                                                                  |
| Lim, V.-C., Ramli, R., Bhassu, S., & Wilson, J.-J.     | 2018 | Pollination implications of the diverse diet of tropical nectar-feeding bats roosting in an urban cave.                                         | <i>PeerJ</i> , 2018(3). <a href="https://doi.org/10.7717/peerj.4572">https://doi.org/10.7717/peerj.4572</a>                                                                         |

|                                                                                                                                                                                      |      |                                                                                                                                         |                                                                                                                                                                         |
|--------------------------------------------------------------------------------------------------------------------------------------------------------------------------------------|------|-----------------------------------------------------------------------------------------------------------------------------------------|-------------------------------------------------------------------------------------------------------------------------------------------------------------------------|
| Lim, V. C., Clare, E. L., Littlefair, J. E., Ramli, R., Bhassu, S., & Wilson, J. J.                                                                                                  | 2018 | Impact of urbanisation and agriculture on the diet of fruit bats.                                                                       | <i>Urban Ecosystems</i> , 21(1), 61–70.<br><a href="https://doi.org/10.1007/s11252-017-0700-3">https://doi.org/10.1007/s11252-017-0700-3</a>                            |
| Mansor, M., Zakariya, K., Harun, N. Z., & Bakar, N. I. A.                                                                                                                            | 2017 | Appreciation of vertical greenery in a city as public art.                                                                              | <i>Planning Malaysia</i> , 15(1), 117–128.<br><a href="https://doi.org/10.21837/pmjournal.v15.i6.227">https://doi.org/10.21837/pmjournal.v15.i6.227</a>                 |
| Meerow, S.                                                                                                                                                                           | 2019 | A green infrastructure spatial planning model for evaluating ecosystem service tradeoffs and synergies across three coastal megacities. | <i>Environmental Research Letters</i> , 14(12).<br><a href="https://doi.org/10.1088/1748-9326/ab502c">https://doi.org/10.1088/1748-9326/ab502c</a>                      |
| Mialhe, F., Gunnell, Y., Navratil, O., Choi, D., Sovann, C., Lejot, J., Gaudau, B., Bunleng, S. & Landon, N.                                                                         | 2019 | Spatial growth of Phnom Penh, Cambodia (1973–2015): Patterns, rates, and socio-ecological consequences.                                 | <i>Land Use Policy</i> , 87(June), 104061.<br><a href="https://doi.org/10.1016/j.landusepol.2019.104061">https://doi.org/10.1016/j.landusepol.2019.104061</a>           |
| Moser-Reischl, A., Uhl, E., Rötzer, T., Biber, P., van Con, T., Tan, N. T., & Pretzsch, H.                                                                                           | 2018 | Effects of the urban heat Island and climate change on the growth of <i>Khaya senegalensis</i> in Hanoi, Vietnam                        | <i>Forest Ecosystems</i> , 5(1).<br><a href="https://doi.org/10.1186/s40663-018-0155-x">https://doi.org/10.1186/s40663-018-0155-x</a>                                   |
| Mrozik, W., Vinitnantharat, S., Thongsamer, T., Pansuk, N., Pattanachan, P., Thayanukul, P., Acharya, K., Baluja, M. Q., Hazlerigg, C., Robson, A. F., Davenport, R. J. & Werner, D. | 2019 | The food-water quality nexus in periurban aquacultures downstream of Bangkok, Thailand.                                                 | <i>Science of the Total Environment</i> , 695, 133923.<br><a href="https://doi.org/10.1016/j.scitotenv.2019.133923">https://doi.org/10.1016/j.scitotenv.2019.133923</a> |
| Nam, V. N., Sasmito, S. D., Murdiyarso, D., Purbopuspito, J., & MacKenzie, R. A.                                                                                                     | 2016 | Carbon stocks in artificially and naturally regenerated mangrove ecosystems in the Mekong Delta.                                        | <i>Wetlands Ecology and Management</i> , 24(2), 231–244.<br><a href="https://doi.org/10.1007/s11273-015-9479-2">https://doi.org/10.1007/s11273-015-9479-2</a>           |
| Nath, T. K., Zhe Han, S. S., & Lechner, A. M.                                                                                                                                        | 2018 | Urban green space and well-being in Kuala Lumpur, Malaysia.                                                                             | <i>Urban Forestry and Urban Greening</i> , 36(September), 34–41. <a href="https://doi.org/10.1016/j.ufug.2018.09.013">https://doi.org/10.1016/j.ufug.2018.09.013</a>    |
| Ngo, K. M., & Lum, S.                                                                                                                                                                | 2018 | Aboveground biomass estimation of tropical street trees.                                                                                | <i>Journal of Urban Ecology</i> , 4(1), 1–6.<br><a href="https://doi.org/10.1093/jue/jux020">https://doi.org/10.1093/jue/jux020</a>                                     |

|                                                                      |      |                                                                                                                                                                           |                                                                                                                                                                             |
|----------------------------------------------------------------------|------|---------------------------------------------------------------------------------------------------------------------------------------------------------------------------|-----------------------------------------------------------------------------------------------------------------------------------------------------------------------------|
| Nguyen, H. H., McAlpine, C., Pullar, D., Leisz, S. J., & Galina, G.  | 2015 | Drivers of Coastal Shoreline Change: Case Study of Hon Dat Coast, Kien Giang, Vietnam                                                                                     | <i>Environmental Management</i> , 55(5), 1093–1108.<br><a href="https://doi.org/10.1007/s00267-015-0455-7">https://doi.org/10.1007/s00267-015-0455-7</a>                    |
| Nguyen, H. T., Pham, T. H., & de Bruyn, L. L.                        | 2017 | Impact of hydroelectric dam development and resettlement on the natural and social capital of rural livelihoods in bo hon village in central vietnam.                     | <i>Sustainability (Switzerland)</i> , 9(8), 1–15.<br><a href="https://doi.org/10.3390/su9081422">https://doi.org/10.3390/su9081422</a>                                      |
| Nguyen, L. D., Nguyen, C. T., Le, H. S., & Tran, B. Q.               | 2019 | Mangrove mapping and above-ground biomass change detection using satellite images in coastal areas of Thai Binh Province, Vietnam.                                        | <i>Forest and Society</i> , 3(2), 248–261.<br><a href="https://doi.org/10.24259/fs.v3i2.7326">https://doi.org/10.24259/fs.v3i2.7326</a>                                     |
| Norhuzailin, H., & Norsidah, U.                                      | 2015 | Users' needs and expectations of Urban recreational forests in Selangor, Malaysia.                                                                                        | <i>Jurnal Teknologi</i> , 75(9), 71–75.<br><a href="https://doi.org/10.11113/jt.v75.5237">https://doi.org/10.11113/jt.v75.5237</a>                                          |
| Norvyani, D. A., Riqqi, A., Harto, A. B., & Safitri, S.              | 2018 | The mapping of quantitative carrying capacity using multi-scale grid system (Case study: Water-provisioning ecosystem services in greater Bandung, West Java, Indonesia). | <i>HAYATI Journal of Biosciences</i> , 25(1), 40–46.<br><a href="https://doi.org/10.4308/hjb.25.1.40">https://doi.org/10.4308/hjb.25.1.40</a>                               |
| Nurda, N., Noguchi, R., & Ahamed, T.                                 | 2020 | Change detection and land suitability analysis for extension of potential forest areas in Indonesia using satellite remote sensing and GIS                                | <i>Forests</i> , 11(4), 1–22.<br><a href="https://doi.org/10.3390/F11040398">https://doi.org/10.3390/F11040398</a>                                                          |
| Omar, D., Ibrahim, F. I., & Mohamad, N. H. N.                        | 2015 | Human Interaction in Open Spaces.                                                                                                                                         | <i>Procedia - Social and Behavioral Sciences</i> , 201, 352–359.<br><a href="https://doi.org/10.1016/j.sbspro.2015.08.186">https://doi.org/10.1016/j.sbspro.2015.08.186</a> |
| Ongsomwang, S., Pattanakiat, S., & Srisuwan, A.                      | 2019 | Impact of land use and land cover change on ecosystem service values: A case study of Khon Kaen City, Thailand.                                                           | <i>Environment and Natural Resources Journal</i> , 17(4), 43–58. <a href="https://doi.org/10.32526/ennrj.17.4.2019.30">https://doi.org/10.32526/ennrj.17.4.2019.30</a>      |
| Pham, V. M., Van Nghiem, S., Bui, Q. T., Pham, T. M., & Van Pham, C. | 2019 | Quantitative assessment of urbanization and impacts in the complex of Huế Monuments, Vietnam.                                                                             | <i>Applied Geography</i> , 112(October 2018), 102096.<br><a href="https://doi.org/10.1016/j.apgeog.2019.102096">https://doi.org/10.1016/j.apgeog.2019.102096</a>            |

|                                                                                                                                                                |      |                                                                                                                                     |                                                                                                                                                                           |
|----------------------------------------------------------------------------------------------------------------------------------------------------------------|------|-------------------------------------------------------------------------------------------------------------------------------------|---------------------------------------------------------------------------------------------------------------------------------------------------------------------------|
| Phoomirat, R., Disyatat, N. R., Park, T. Y., Lee, D. K., & Dumrongrojwatthana, P.                                                                              | 2020 | Rapid assessment checklist for green roof ecosystem services in Bangkok, Thailand.                                                  | <i>Ecological Processes</i> , 9(1).<br><a href="https://doi.org/10.1186/s13717-020-00222-z">https://doi.org/10.1186/s13717-020-00222-z</a>                                |
| Pierce, J. R., Barton, M. A., Tan, M. M. J., Oertel, G., Halder, M. D., Lopez-Guijosa, P. A., & Nuttall, R.                                                    | 2020 | Actions, indicators, and outputs in urban biodiversity plans: A multinational analysis of city practice.                            | <i>PloS One</i> , 15(7), e0235773.<br><a href="https://doi.org/10.1371/journal.pone.0235773">https://doi.org/10.1371/journal.pone.0235773</a>                             |
| Poerwoningsih, D., Antariksa, Leksono, A. S., & Hasyim, A. W.                                                                                                  | 2015 | Implementing visual resource management to support green corridor planning.                                                         | <i>Ecology, Environment and Conservation</i> , 21(4), 539–546.                                                                                                            |
| Poortinga, A., Nguyen, Q., Tenneson, K., Troy, A., Saah, D., Bhandari, B., Ellenburg, W. L., Aekakkararungroj, A., Ha, L., Pham, H., Nguyen, G. & Chishtie, F. | 2019 | Linking Earth Observations for Assessing the Food Security Situation in Vietnam: A Landscape Approach.                              | <i>Frontiers in Environmental Science</i> , 7(December), 1–16. <a href="https://doi.org/10.3389/fenvs.2019.00186">https://doi.org/10.3389/fenvs.2019.00186</a>            |
| Pribadi, D. O., Vollmer, D., & Pauleit, S.                                                                                                                     | 2018 | Impact of peri-urban agriculture on runoff and soil erosion in the rapidly developing metropolitan area of Jakarta, Indonesia.      | <i>Regional Environmental Change</i> , 18(7), 2129–2143.<br><a href="https://doi.org/10.1007/s10113-018-1341-7">https://doi.org/10.1007/s10113-018-1341-7</a>             |
| Pribadi, D. O., Zasada, I., Müller, K., & Pauleit, S.                                                                                                          | 2017 | Multifunctional adaption of farmers as response to urban growth in the Jabodetabek Metropolitan Area, Indonesia.                    | <i>Journal of Rural Studies</i> , 55, 100–111.<br><a href="https://doi.org/10.1016/j.jrurstud.2017.08.001">https://doi.org/10.1016/j.jrurstud.2017.08.001</a>             |
| Quintal, A. L., Gotangco, C. K., & Guzman, M. A. L.                                                                                                            | 2018 | Forecasting Urban Expansion in the Seven Lakes Area in San Pablo City, Laguna, the Philippines Using the Land Transformation Model. | <i>Environment and Urbanization ASIA</i> , 9(1), 69–85.<br><a href="https://doi.org/10.1177/0975425317748531">https://doi.org/10.1177/0975425317748531</a>                |
| Quiros, T. E. A. L., Beck, M. W., Araw, A., Croll, D. A., & Tershy, B.                                                                                         | 2018 | Small-scale seagrass fisheries can reduce social vulnerability: a comparative case study.                                           | <i>Ocean and Coastal Management</i> , 157(March), 56–67.<br><a href="https://doi.org/10.1016/j.ocecoaman.2018.02.003">https://doi.org/10.1016/j.ocecoaman.2018.02.003</a> |

|                                                                                                                                                                    |      |                                                                                                                                                                 |                                                                                                                                                                          |
|--------------------------------------------------------------------------------------------------------------------------------------------------------------------|------|-----------------------------------------------------------------------------------------------------------------------------------------------------------------|--------------------------------------------------------------------------------------------------------------------------------------------------------------------------|
| Rahman, A. A. A., Mohamed, M., & Linatoc, A. C.                                                                                                                    | 2018 | Butterfly (Lepidoptera: Rhopalocera) diversity in Bukit Soga, the green lung of Batu Pahat, Malaysia.                                                           | <i>AIP Conference Proceedings</i> , 2002(August).<br><a href="https://doi.org/10.1063/1.5050101">https://doi.org/10.1063/1.5050101</a>                                   |
| Rambonilaza, T., & Neang, M.                                                                                                                                       | 2019 | Exploring the potential of local market in remunerating water ecosystem services in Cambodia: An application for endogenous attribute non-attendance modelling. | <i>Water Resources and Economics</i> , 25(December 2016), 14–26. <a href="https://doi.org/10.1016/j.wre.2018.07.001">https://doi.org/10.1016/j.wre.2018.07.001</a>       |
| Relacion, P. R., Sy, A. S., Rodas, G. A. N., Cayanan, A. L. C., Marcelino, D. R. C., Sakamoto, K. C., Medina, L.R. Pabalate, H.D. Nacua, A.E. & Clemente, K. J. E. | 2018 | Floristic composition assessment of urban mangroves in Batasan River, Metro Manila, Philippines.                                                                | <i>AACL Bioflux</i> , 11(4), 1136–1143.                                                                                                                                  |
| Remondi, F., Burlando, P., & Vollmer, D.                                                                                                                           | 2016 | Exploring the hydrological impact of increasing urbanisation on a tropical river catchment of the metropolitan Jakarta, Indonesia.                              | <i>Sustainable Cities and Society</i> , 20, 210–221.<br><a href="https://doi.org/10.1016/j.scs.2015.10.001">https://doi.org/10.1016/j.scs.2015.10.001</a>                |
| Richards, D. R., Fung, T. K., Belcher, R. N., & Edwards, P. J.                                                                                                     | 2020 | Differential air temperature cooling performance of urban vegetation types in the tropics.                                                                      | <i>Urban Forestry and Urban Greening</i> , 50(June 2019).<br><a href="https://doi.org/10.1016/j.ufug.2020.126651">https://doi.org/10.1016/j.ufug.2020.126651</a>         |
| Richards, D.R., & Edwards, P. J.                                                                                                                                   | 2017 | Quantifying street tree regulating ecosystem services using Google Street View.                                                                                 | <i>Ecological Indicators</i> , 77, 31–40.<br><a href="https://doi.org/10.1016/j.ecolind.2017.01.028">https://doi.org/10.1016/j.ecolind.2017.01.028</a>                   |
| Richards, D.R., Passy, P., & Oh, R. R. Y.                                                                                                                          | 2017 | Impacts of population density and wealth on the quantity and structure of urban green space in tropical Southeast Asia.                                         | <i>Landscape and Urban Planning</i> , 157, 553–560.<br><a href="https://doi.org/10.1016/j.landurbplan.2016.09.005">https://doi.org/10.1016/j.landurbplan.2016.09.005</a> |
| Richards, D.R., Tunçer, B., & Tunçer, B.                                                                                                                           | 2018 | Using image recognition to automate assessment of cultural ecosystem services from social media photographs.                                                    | <i>Ecosystem Services</i> , 31, 318–325.<br><a href="https://doi.org/10.1016/j.ecoser.2017.09.004">https://doi.org/10.1016/j.ecoser.2017.09.004</a>                      |
| Richards, Daniel R., & Friess, D. A.                                                                                                                               | 2015 | A rapid indicator of cultural ecosystem service usage at a fine spatial scale: Content analysis of social media photographs.                                    | <i>Ecological Indicators</i> , 53, 187–195.<br><a href="https://doi.org/10.1016/j.ecolind.2015.01.034">https://doi.org/10.1016/j.ecolind.2015.01.034</a>                 |

|                                                                                                               |      |                                                                                                      |                                                                                                                                                                                                              |
|---------------------------------------------------------------------------------------------------------------|------|------------------------------------------------------------------------------------------------------|--------------------------------------------------------------------------------------------------------------------------------------------------------------------------------------------------------------|
| Richards, Daniel R., Fung, T. K.,<br>Leong, R. A. T.,<br>Sachidhanandam, U., Drillet, Z.,<br>& Edwards, P. J. | 2020 | Demographic biases in engagement with nature in a tropical Asian city.                               | <i>PLoS ONE</i> , 15(4), 1–17.<br><a href="https://doi.org/10.1371/journal.pone.0231576">https://doi.org/10.1371/journal.pone.0231576</a>                                                                    |
| Richards, D. R. &<br>Friess, D. A.                                                                            | 2017 | Characterizing Coastal Ecosystem Service Trade-offs with Future Urban Development in a Tropical City | <i>Environmental Management</i> , 60(5), 961-973,<br><a href="https://doi.org/10.1007/s00267-017-0924-2">https://doi.org/10.1007/s00267-017-0924-2</a>                                                       |
| Rumahorbo, B. T., Hamuna, B., &<br>Keiluhu, H. J.                                                             | 2020 | An assessment of the coastal ecosystem services of Jayapura City, Papua Province, Indonesia.         | <i>Environmental &amp; Socio-Economic Studies</i> , 8(2), 45–53.<br><a href="https://doi.org/10.2478/environ-2020-0011">https://doi.org/10.2478/environ-2020-0011</a>                                        |
| Sangkakool, T. & Techato, K.                                                                                  | 2017 | Environmental Benefits of Air Plant Green Roofs in Hot and Humid Climate                             | <i>Journal of Engineering and Applied Sciences</i> , 12(5), 6939-6946                                                                                                                                        |
| Shrestha, M., Shrestha, S., &<br>Shrestha, P. K.                                                              | 2020 | Evaluation of land use change and its impact on water yield in Songkhram River basin, Thailand       | <i>International Journal of River Basin Management</i> , 18(1), 23–31.<br><a href="https://doi.org/10.1080/15715124.2019.1566239">https://doi.org/10.1080/15715124.2019.1566239</a>                          |
| Sia, A., Kua, E H. & Ho, R.                                                                                   | 2019 | Building Social Resilience Through Parks and Common Recreational Spaces                              | <i>Building Resilient Neighbourhoods in Singapore</i> , Advances in 21st Century Human Settlements,<br><a href="https://doi.org/10.1007/978-981-13-7048-9_4">https://doi.org/10.1007/978-981-13-7048-9_4</a> |
| Sieber, J., Fremgen, L., & Pons, M.                                                                           | 2014 | Assessment of Ecosystem Services for Urban Resilience--Case Study in Singapore.                      | <i>Planet@ Risk</i> , 3(1), 77–86.                                                                                                                                                                           |
| Sieber, J., & Pons, M.                                                                                        | 2015 | Assessment of Urban Ecosystem Services using Ecosystem Services Reviews and GIS-based Tools.         | <i>Procedia Engineering</i> , 115, 53–60.<br><a href="https://doi.org/10.1016/J.PROENG.2015.07.354">https://doi.org/10.1016/J.PROENG.2015.07.354</a>                                                         |
| Sini, R.                                                                                                      | 2020 | Singapore's Green Infrastructure and Biophilic Urbanism.                                             | <i>In Advances in 21st Century Human Settlements</i> .<br><a href="https://doi.org/10.1007/978-981-13-6746-5_8">https://doi.org/10.1007/978-981-13-6746-5_8</a>                                              |
| Sommeechai, M., Wachrinrat, C.,<br>Dell, B., Thangtam, N., &<br>Srichaichana, J.                              | 2018 | Ecological structure of a tropical urban forest in the Bang Kachao Peninsula, Bangkok.               | <i>Forests</i> , 9(1), 1–15. <a href="https://doi.org/10.3390/f9010036">https://doi.org/10.3390/f9010036</a>                                                                                                 |

|                                                                                    |      |                                                                                                                                                     |                                                                                                                                                                                                                   |
|------------------------------------------------------------------------------------|------|-----------------------------------------------------------------------------------------------------------------------------------------------------|-------------------------------------------------------------------------------------------------------------------------------------------------------------------------------------------------------------------|
| Son, N. T., Chen, C. F., Chang, N. Bin, Chen, C. R., Chang, L. Y., & Thanh, B. X.  | 2015 | Mangrove mapping and change detection in ca mau peninsula, vietnam, using landsat data and object-based image analysis.                             | <i>IEEE Journal of Selected Topics in Applied Earth Observations and Remote Sensing</i> , 8(2), 503–510.<br><a href="https://doi.org/10.1109/JSTARS.2014.2360691">https://doi.org/10.1109/JSTARS.2014.2360691</a> |
| Song, X. P., Richards, D. R., & Tan, P. Y.                                         | 2020 | Using social media user attributes to understand human–environment interactions at urban parks.                                                     | <i>Scientific Reports</i> , 10(1), 1–11.<br><a href="https://doi.org/10.1038/s41598-020-57864-4">https://doi.org/10.1038/s41598-020-57864-4</a>                                                                   |
| Sreetheran, M.                                                                     | 2017 | Exploring the urban park use, preference and behaviours among the residents of Kuala Lumpur, Malaysia.                                              | <i>Urban Forestry &amp; Urban Greening</i> , 25, 85–93.<br><a href="https://doi.org/10.1016/J.UFUG.2017.05.003">https://doi.org/10.1016/J.UFUG.2017.05.003</a>                                                    |
| Srichaichana, J., Trisurat, Y., & Ongsomwang, S.                                   | 2019 | Land use and land cover scenarios for optimum water yield and sediment retention ecosystem services in Klong U-Tapao watershed, Songkhla, Thailand. | <i>Sustainability (Switzerland)</i> , 11(10).<br><a href="https://doi.org/10.3390/su11102895">https://doi.org/10.3390/su11102895</a>                                                                              |
| Sritongchuay, T., Hughes, A. C., & Bumrungsri, S.                                  | 2019 | The role of bats in pollination networks is influenced by landscape structure.                                                                      | <i>Global Ecology and Conservation</i> , 20, e00702.<br><a href="https://doi.org/10.1016/j.gecco.2019.e00702">https://doi.org/10.1016/j.gecco.2019.e00702</a>                                                     |
| Stewart, A. B., Sritongchuay, T., Teartisup, P., Kaewsomboon, S., & Bumrungsri, S. | 2018 | Habitat and landscape factors influence pollinators in a tropical megacity, Bangkok, Thailand.                                                      | <i>PeerJ</i> , 2018(7). <a href="https://doi.org/10.7717/peerj.5335">https://doi.org/10.7717/peerj.5335</a>                                                                                                       |
| Tan, P. Y., Feng, Y., & Hwang, Y. H.                                               | 2016 | Deforestation in a tropical compact city (Part A): Understanding its socio-ecological impacts.                                                      | <i>Smart and Sustainable Built Environment</i> , 5(1), 47–72.<br><a href="https://doi.org/10.1108/SASBE-08-2015-0022">https://doi.org/10.1108/SASBE-08-2015-0022</a>                                              |
| Tan, P. Y., & Ismail, M. R. Bin.                                                   | 2015 | Building shade affects light environment and urban greenery in high-density residential estates in Singapore.                                       | <i>Urban Forestry and Urban Greening</i> , 13(4), 771–784.<br><a href="https://doi.org/10.1016/j.ufug.2014.05.011">https://doi.org/10.1016/j.ufug.2014.05.011</a>                                                 |
| Tan, P. Y., & Ismail, M. R. Bin.                                                   | 2015 | The effects of urban forms on photosynthetically active radiation and urban greenery in a compact city.                                             | <i>Urban Ecosystems</i> , 18(3), 937–961.<br><a href="https://doi.org/10.1007/s11252-015-0461-9">https://doi.org/10.1007/s11252-015-0461-9</a>                                                                    |
| Tan, P. Y., & Samsudin, R.                                                         | 2017 | Effects of spatial scale on assessment of spatial equity of urban park provision                                                                    | <i>Landscape and Urban Planning</i> , 158, 139–154.<br><a href="https://doi.org/10.1016/j.landurbplan.2016.11.001">https://doi.org/10.1016/j.landurbplan.2016.11.001</a>                                          |

|                                                                            |      |                                                                                                                         |                                                                                                                                                                                     |
|----------------------------------------------------------------------------|------|-------------------------------------------------------------------------------------------------------------------------|-------------------------------------------------------------------------------------------------------------------------------------------------------------------------------------|
| Tang, G. S. Y., Sadanandan, K. R., & Rheindt, F. E.                        | 2016 | Population genetics of the olive-winged bulbul ( <i>Pycnonotus plumosus</i> ) in a tropical urban-fragmented landscape. | <i>Ecology and Evolution</i> , 6(1), 78–90.<br><a href="https://doi.org/10.1002/ece3.1832">https://doi.org/10.1002/ece3.1832</a>                                                    |
| Tantipisanuh, N., Gale, G. A., & Round, P. D.                              | 2016 | Incidental impacts from major road construction on one of Asia's most important wetlands: the Inner Gulf of Thailand.   | <i>Pacific Conservation Biology</i> , 22(1), 29.<br><a href="https://doi.org/10.1071/PC15028">https://doi.org/10.1071/PC15028</a>                                                   |
| Thiagarajah, J., Wong, S. K. M., Richards, D. R., & Friess, D. A.          | 2015 | Historical and contemporary cultural ecosystem service values in the rapidly urbanizing city state of Singapore.        | <i>Ambio</i> , 44(7), 666–677.<br><a href="https://doi.org/10.1007/s13280-015-0647-7">https://doi.org/10.1007/s13280-015-0647-7</a>                                                 |
| Timm, S., Dearborn, L., & Pomeroy, J.                                      | 2018 | Nature and the City: Measuring the Attention Restoration Benefits of Singapore's Urban Vertical Greenery.               | <i>Technology Architecture and Design</i> , 2(2), 240–249.<br><a href="https://doi.org/10.1080/24751448.2018.1497377">https://doi.org/10.1080/24751448.2018.1497377</a>             |
| Tor-Ngern, P., & Leksungnoen, N.                                           | 2020 | Investigating carbon dioxide absorption by urban trees in a new park of Bangkok, Thailand.                              | <i>BMC Ecology</i> , 20(1), 20.<br><a href="https://doi.org/10.1186/s12898-020-00289-4">https://doi.org/10.1186/s12898-020-00289-4</a>                                              |
| Tor-ngern, P., & Puangchit, L. (2018).                                     | 2018 | Effects of varying soil and atmospheric water deficit on water use characteristics of tropical street tree species.     | <i>Urban Forestry &amp; Greening</i> , 36, 76–83.<br><a href="https://doi.org/10.1016/j.ufug.2018.10.010">https://doi.org/10.1016/j.ufug.2018.10.010</a>                            |
| Ureta, J. C. P., Lasco, R. D., Sajise, A. J. U., & Calderon, M. M.         | 2014 | Oroquieta City households' willingness to pay for coastal biodiversity conservation.                                    | <i>Journal of Sustainable Development</i> , 7(5), 82–92.<br><a href="https://doi.org/10.5539/jsd.v7n5p82">https://doi.org/10.5539/jsd.v7n5p82</a>                                   |
| Uy, N., & Shaw, R.                                                         | 2013 | Ecosystem resilience and community values: Implications to ecosystem-based adaptation.                                  | <i>Journal of Disaster Research</i> , 8(1), 201–202.                                                                                                                                |
| van Noordwijk, M., Kim, Y. S., Leimona, B., Hairiah, K., & Fisher, L. A.   | 2016 | Metrics of water security, adaptive capacity, and agroforestry in Indonesia.                                            | <i>Current Opinion in Environmental Sustainability</i> , 21, 1–8. <a href="https://doi.org/10.1016/j.cosust.2016.10.004">https://doi.org/10.1016/j.cosust.2016.10.004</a>           |
| Vande Velde, K., Hugé, J., Friess, D. A., Koedam, N., & Dahdouh-Guebas, F. | 2019 | Stakeholder discourses on urban mangrove conservation and management.                                                   | <i>Ocean and Coastal Management</i> , 178(September 2018), 104810.<br><a href="https://doi.org/10.1016/j.ocecoaman.2019.05.012">https://doi.org/10.1016/j.ocecoaman.2019.05.012</a> |

|                                                                                                                                                                                  |      |                                                                                                                                                    |                                                                                                                                                                            |
|----------------------------------------------------------------------------------------------------------------------------------------------------------------------------------|------|----------------------------------------------------------------------------------------------------------------------------------------------------|----------------------------------------------------------------------------------------------------------------------------------------------------------------------------|
| Vojinovic, Z., Keerakamolchai, W., Weesakul, S., Pudar, R. S., Medina, N., & Alves, A.                                                                                           | 2016 | Combining ecosystem services with cost-benefit analysis for selection of green and grey infrastructure for flood protection in a cultural setting. | <i>Environments - MDPI</i> , 4(1), 1–16.<br><a href="https://doi.org/10.3390/environments4010003">https://doi.org/10.3390/environments4010003</a>                          |
| Vollmer, D., Costa, D., Lin, E. S., Ninsalam, Y., Shaad, K., Prescott, M. F., Gurusamy, S., Remondi, F., Padawangi, R., Burlando, P., Girot, C., Grêt-Regamey, A. & Rekittke, J. | 2015 | Changing the Course of Rivers in an Asian City: Linking Landscapes to Human Benefits through Iterative Modeling and Design.                        | <i>Journal of the American Water Resources Association</i> , 51(3), 672–688. <a href="https://doi.org/10.1111/1752-1688.12316">https://doi.org/10.1111/1752-1688.12316</a> |
| Vollmer, D., & Grêt-Regamey, A.                                                                                                                                                  | 2013 | Rivers as municipal infrastructure: Demand for environmental services in informal settlements along an Indonesian river.                           | <i>Global Environmental Change</i> , 23(6), 1542–1555.<br><a href="https://doi.org/10.1016/j.gloenvcha.2013.10.001">https://doi.org/10.1016/j.gloenvcha.2013.10.001</a>    |
| Vollmer, D., Prescott, M. F., Padawangi, R., Girot, C., & Grêt-Regamey, A.                                                                                                       | 2015 | Understanding the value of urban riparian corridors: Considerations in planning for cultural services along an Indonesian river.                   | <i>Landscape and Urban Planning</i> , 138, 144–154.<br><a href="https://doi.org/10.1016/j.landurbplan.2015.02.011">https://doi.org/10.1016/j.landurbplan.2015.02.011</a>   |
| Vollmer, D., Ryffel, A. N., Djaja, K., & Gret-Regamy, A.                                                                                                                         | 2016 | Examining Demand For Urban River Rehabilitation In Indonesia: Insights from a spatially explicit discrete choice experiment.                       | <i>Land Use Policy</i> doi:<br>10.110.1016/j.landusepol.2016.06.017                                                                                                        |
| Wang, C., Er, S. S., & Abdul-Rahman, H.                                                                                                                                          | 2014 | Indoor vertical greenery system in urban tropics.                                                                                                  | <i>Indoor and Built Environment</i> , 25(2), 340–356.<br><a href="https://doi.org/10.1177/1420326X14550508">https://doi.org/10.1177/1420326X14550508</a>                   |
| Warner, K., Zommers, Z., Wreford, A., Hurlbert, M., Viner, D., Scantlan, J., Halsey, K., Halsey, K., & Tamang, C.                                                                | 2019 | Characteristics of transformational adaptation in climate-land-society interactions.                                                               | <i>Sustainability (Switzerland)</i> , 11(2), 1–22.<br><a href="https://doi.org/10.3390/su11020356">https://doi.org/10.3390/su11020356</a>                                  |
| Watkin, L. J., Ruangpan, L., Vojinovic, Z., Weesakul, S., & Torres, A. S.                                                                                                        | 2019 | A framework for assessing benefits of implemented nature-based solutions.                                                                          | <i>Sustainability (Switzerland)</i> , 11(23), 1–25.<br><a href="https://doi.org/10.3390/su11236788">https://doi.org/10.3390/su11236788</a>                                 |

|                                                                                                                                                                                                                                                                                                                                            |      |                                                                                                                                                                      |                                                                                                                                                                      |
|--------------------------------------------------------------------------------------------------------------------------------------------------------------------------------------------------------------------------------------------------------------------------------------------------------------------------------------------|------|----------------------------------------------------------------------------------------------------------------------------------------------------------------------|----------------------------------------------------------------------------------------------------------------------------------------------------------------------|
| Wiryo, Yansen, Aditya, Lamhot, D. J., & Hutahae, J.                                                                                                                                                                                                                                                                                        | 2018 | Short communication: The species diversity and composition of roadside trees in five cities in Sumatra, Indonesia.                                                   | <i>Biodiversitas</i> , 19(5), 1615–1621.<br><a href="https://doi.org/10.13057/biodiv/d190503">https://doi.org/10.13057/biodiv/d190503</a>                            |
| Wolanski, E.                                                                                                                                                                                                                                                                                                                               | 2006 | Increasing trade and urbanisation of the Asia Pacific Coast.                                                                                                         | <i>The Environment in Asia Pacific Harbours</i> , 1–13.<br><a href="https://doi.org/10.1007/1-4020-3655-8_1">https://doi.org/10.1007/1-4020-3655-8_1</a>             |
| Wolff, N. H., Masuda, Y. J., Meijaard, E., Wells, J. A., & Game, E. T.                                                                                                                                                                                                                                                                     | 2018 | Impacts of tropical deforestation on local temperature and human well-being perceptions.                                                                             | <i>Global Environmental Change</i> , 52, 181–189.<br><a href="https://doi.org/10.1016/j.gloenvcha.2018.07.004">https://doi.org/10.1016/j.gloenvcha.2018.07.004</a>   |
| Wyckhuys, K. A. G., Wongtiem, P., Rauf, A., Thancharoen, A., Heimpel, G. E., Le, N. T. T., Fanani, M. Z., Gurr, G. M., Lundgren, J. G., Burra, D. D., Palao, L. K., Hyman, G., Graziosi, I., Le, V. X., Cock, M. J. W., Tschirntke, T., Wratten, S. D., Nguyen, L. V., You, M., Lu, Y., Ketelaar, J. W., Goergen, G., & Neuenschwander, P. | 2018 | Continental-scale suppression of an invasive pest by a host-specific parasitoid underlines both environmental and economic benefits of arthropod biological control. | <i>PeerJ</i> , 6, e5796. <a href="https://doi.org/10.7717/peerj.5796">https://doi.org/10.7717/peerj.5796</a>                                                         |
| Yen, Y., Wang, Z., Shi, Y., & Soeung, B.                                                                                                                                                                                                                                                                                                   | 2016 | An assessment of the knowledge and demand of young residents regarding the ecological services of urban green spaces in Phnom Penh, Cambodia.                        | <i>Sustainability (Switzerland)</i> , 8(6).<br><a href="https://doi.org/10.3390/su8060523">https://doi.org/10.3390/su8060523</a>                                     |
| Yotapakdee, T., Asanok, L., Kamy, T., Norsangsri, M., Karnasuta, N., Navakam, S., & Kaewborisut, C.                                                                                                                                                                                                                                        | 2019 | Benefits and value of big trees in urban area: A study in bang kachao green space, Thailand.                                                                         | <i>Environment and Natural Resources Journal</i> , 17(1), 33–43. <a href="https://doi.org/10.32526/enrj.17.1.2019.04">https://doi.org/10.32526/enrj.17.1.2019.04</a> |
| Yu, K.                                                                                                                                                                                                                                                                                                                                     | 2020 | Work with and by Nature: The Essence of Territorial Spatial Planning and Ecological Restoration.                                                                     | <i>Landscape Architecture Frontiers</i> , 8(1), 4–9.<br><a href="https://doi.org/">https://doi.org/</a>                                                              |

|                                   |      |                                                                                                                                   |                                                                                                                                                                                     |
|-----------------------------------|------|-----------------------------------------------------------------------------------------------------------------------------------|-------------------------------------------------------------------------------------------------------------------------------------------------------------------------------------|
|                                   |      |                                                                                                                                   | org/10.15302/J-LAF-1-010006                                                                                                                                                         |
| Yuniastuti, E., & Hasibuan, H. S. | 2019 | Green Open Space, Towards A Child-Friendly City (A Case Study in Lembah Gurame Park, Depok City, Jakarta Greater Area, Indonesia) | <i>IOP Conference Series: Earth and Environmental Science</i> , 328(1). <a href="https://doi.org/10.1088/1755-1315/328/1/012016">https://doi.org/10.1088/1755-1315/328/1/012016</a> |
| Zhang, L., & Tan, P. Y.           | 2019 | Associations between urban green spaces and health are dependent on the analytical scale and how urban green spaces are measured. | <i>International Journal of Environmental Research and Public Health</i> , 16(4). <a href="https://doi.org/10.3390/ijerph16040578">https://doi.org/10.3390/ijerph16040578</a>       |
